# Supplementary material
Source: HighWire-hosted journal article supplement (https://bmjopen.bmj.com/content/14/7/e081363)
Supplement: inline-supplementary-material-1 [file inline-supplementary-material-1.pdf]

| Type of training program                                                                          | Entrance requirement                                     | Duration of training           | Recognition                              | Total duration                                                   | Output per year*                        |
|---------------------------------------------------------------------------------------------------|----------------------------------------------------------|--------------------------------|------------------------------------------|------------------------------------------------------------------|-----------------------------------------|
| <b>A.M. Dogliotti medical college.</b>                                                            | BSc in natural or physical sciences (3-4 years)          | 5-years + a 2-years internship | Master degree                            | 10-11 years                                                      | 20-40 per year                          |
| <b>JFK hospital/ LCPS post-graduate training program.</b>                                         | Medical officer                                          | 5 years                        | Specialist surgeon or gynecologist       | 15-16 years                                                      | 2 surgeons and 2 gynecologists per year |
| <b>The Tubman National Institute of Medical Arts (TNIMA). Public PA training institute.</b>       | Secondary school degree                                  | 3-years                        | Diploma degree                           | 3-years                                                          | 30 per year                             |
| <b>Baptist College of Missionary Physician Assistants (BSMPA). Public PA training institute.</b>  | Secondary school                                         | 3-years                        | Diploma degree                           | 3-years                                                          | 10 per year                             |
| <b>The Cuttington University School of PAs (CUSPA). Private PA training institute.</b>            | Secondary school                                         | 4-years                        | In transition from diploma to BSc degree | 4-years                                                          | 30 per year                             |
| <b>Training program for clinical obstetricians (COs) in Liberia.</b>                              | Midwives with at least a few years of experience         | 3-years                        | Diploma degree                           | Depending on experience prior to start of training (+/- 8 years) | 1-2 per year                            |
| <b>Surgical training program for associate clinicians in Sierra Leone. Supported by CapaCare.</b> | Associate clinician with at least 2-years of experience. | 3-years                        | Diploma degree                           | 8-years                                                          | 5 per year                              |

Supplementary material 1. Comparing specifications of relevant training programs in Liberia and Sierra Leone. \*As an estimate reported by various interviewees over the year 2019.
